# Supplementary material for: Identification of Early Symptoms Associated with Subsequent Immune-related Adverse Events in the I-SPY clinical trial
Source: Research Square preprint supplement (doi:10.21203/rs.3.rs-8689063/v1), 2026-02-11
Supplement: Supplementary file 1 [file 30171c8497ff9d2b2a9cfe17.xlsx]

## Sheet: Sheet1
	N = 216
Age
Mean (SD)	49.9 (12.2)
Median [Min, Max]	48 [20.0, 78.0]
Race
Asian	13 (6.0%)
Black	30 (13.9%)
White	138 (63.9%)
Other/Unknown	7 (3.2%)
Not reported/prefer not to disclose	28 (13.0%)
Ethnicity
Hispanic	27 (12.5%)
Not Hispanic	182 (84.3%)
Not reported/Prefer not to disclose	7 (3.2%)
