# Supplementary material for: Identification of Early Symptoms Associated with Subsequent Immune-related Adverse Events in the I-SPY clinical trial
Source: Research Square preprint supplement (doi:10.21203/rs.3.rs-8689063/v1), 2026-02-11
Supplement: Supplementary file 2 [file 384c7212b803543cb40ada82.xlsx]

## Sheet: SuppTable
threshold_symptomAUCsum	specificity	sensitivity	accuracy	Annotation
14.5	0.7423	0.5676	0.7283	Youden's best
6.5	0.6738	0.5946	0.6674
5.5	0.6667	0.5946	0.6609
4.5	0.6619	0.5946	0.6565
3.5	0.6572	0.5946	0.6522
2.5	0.6501	0.5946	0.6457
1.5	0.617	0.5946	0.6152
0.5	0.6028	0.5946	0.6022
14.5	0.7423	0.5676	0.7283
13.5	0.7258	0.5676	0.713
12	0.7234	0.5676	0.7109
10.5	0.7187	0.5676	0.7065
9.5	0.7139	0.5676	0.7022
8.5	0.7092	0.5676	0.6978
7.5	0.6974	0.5676	0.687
16.5	0.7518	0.5405	0.7348
15.5	0.7447	0.5405	0.7283
17.5	0.7541	0.4865	0.7326
20.5	0.773	0.4595	0.7478
19.5	0.7636	0.4595	0.7391
18.5	0.7589	0.4595	0.7348
27.5	0.8322	0.4324	0.8
26.5	0.8227	0.4324	0.7913
25.5	0.8156	0.4324	0.7848
24.5	0.8109	0.4324	0.7804
23.5	0.8061	0.4324	0.7761
22.5	0.7967	0.4324	0.7674
21.5	0.7825	0.4324	0.7543
31.5	0.8629	0.3784	0.8239
30.5	0.8605	0.3784	0.8217
29.5	0.8558	0.3784	0.8174
28.5	0.8416	0.3784	0.8043
32.5	0.8676	0.3514	0.8261
33.5	0.8723	0.3243	0.8283
39.5	0.9173	0.2973	0.8674
38.5	0.9149	0.2973	0.8652
37.5	0.9054	0.2973	0.8565
36.5	0.8983	0.2973	0.85
35.5	0.8936	0.2973	0.8457
34.5	0.8818	0.2973	0.8348
40.5	0.9243	0.2432	0.8696
57.5	0.9669	0.2162	0.9065
55.5	0.9645	0.2162	0.9043
54.5	0.9622	0.2162	0.9022
53.5	0.9598	0.2162	0.9
52.5	0.9574	0.2162	0.8978
51	0.9551	0.2162	0.8957
49.5	0.9527	0.2162	0.8935
47	0.948	0.2162	0.8891
44.5	0.9456	0.2162	0.887
43.5	0.9433	0.2162	0.8848
42.5	0.9409	0.2162	0.8826
41.5	0.9314	0.2162	0.8739
64.5	0.9811	0.1892	0.9174
63.5	0.9787	0.1892	0.9152
62.5	0.9764	0.1892	0.913
61.5	0.974	0.1892	0.9109
60.5	0.9716	0.1892	0.9087
59.5	0.9693	0.1892	0.9065
87	0.9929	0.1622	0.9261
81	0.9905	0.1622	0.9239
77	0.9882	0.1622	0.9217
73	0.9858	0.1622	0.9196
69.5	0.9835	0.1622	0.9174
67	0.9811	0.1622	0.9152
90.5	0.9929	0.1351	0.9239
99	0.9929	0.1081	0.9217
109.5	0.9929	0.0811	0.9196
121	0.9953	0.0541	0.9196
115	0.9929	0.0541	0.9174
128	0.9953	0.027	0.9174
