# Supplementary material for: Identification of Early Symptoms Associated with Subsequent Immune-related Adverse Events in the I-SPY clinical trial
Source: Research Square preprint supplement (doi:10.21203/rs.3.rs-8689063/v1), 2026-02-11
Supplement: Supplementary file 3 [file 5273abb9c007f0a79cdec5c3.xlsx]

## Sheet: Sheet1
	Adrenal Insufficiency															Hypothyroidism
	Week 4					Week 6					Week 8					Week 4					Week 6					Week 8
symptom	In Cases (N=38)	In Control (N=423)	Odds Ratio	Adjusted p-value	Rank	In Cases (N=37)	In Control (N=423)	Odds Ratio	Adjusted p-value	Rank	In Cases (N=36)	In Control (N=423)	Odds Ratio	Adjusted p-value	Rank	In Cases (N=58)	In Control (N=400)	Odds Ratio	Adjusted p-value	Rank	In Cases (N=58)	In Control (N=400)	Odds Ratio	Adjusted p-value	Rank	In Cases (N=50)	In Control (N=400)	Odds Ratio	Adjusted p-value	Rank
Abdominal_pain	0 (0%)	5 (1.2%)	0	1	17	0 (0%)	6 (1.4%)	0	1	19	0 (0%)	7 (1.7%)	0	1	22	0 (0%)	5 (1.3%)	0	1	15	0 (0%)	6 (1.5%)	0	1	20	0 (0%)	7 (1.8%)	0	1	19
Acne	0 (0%)	3 (0.7%)	0	1	18	0 (0%)	8 (1.9%)	0	1	20	1 (2.8%)	10 (2.4%)	1.18	0.6	17	0 (0%)	3 (0.7%)	0	1	16	1 (1.7%)	7 (1.8%)	0.98	0.66	14	2 (4%)	9 (2.2%)	1.81	0.35	9
Blurry_vision	0 (0%)	0 (0%)	NA	0		0 (0%)	1 (0.2%)	0	1	21	0 (0%)	3 (0.7%)	0	1	23	0 (0%)	0 (0%)	NA	0		1 (1.7%)	0 (0%)	Inf	0.13	5	0 (0%)	2 (0.5%)	0	1	20
Constipation	2 (5.3%)	1 (0.2%)	23.03	0.019	2	2 (5.4%)	1 (0.2%)	23.68	0.018	1	3 (8.3%)	3 (0.7%)	12.56	0.0075	1	0 (0%)	3 (0.7%)	0	1	17	0 (0%)	3 (0.7%)	0	1	21	0 (0%)	6 (1.5%)	0	1	21
Cough	0 (0%)	1 (0.2%)	0	1	19	0 (0%)	3 (0.7%)	0	1	22	0 (0%)	7 (1.7%)	0	1	24	0 (0%)	1 (0.2%)	0	1	18	0 (0%)	3 (0.7%)	0	1	22	1 (2%)	6 (1.5%)	1.34	0.56	13
Decreased_appetite	1 (2.6%)	4 (0.9%)	2.82	0.35	11	1 (2.7%)	7 (1.7%)	1.65	0.49	14	1 (2.8%)	7 (1.7%)	1.7	0.48	11	0 (0%)	5 (1.3%)	0	1	19	1 (1.7%)	8 (2%)	0.86	0.71	15	0 (0%)	8 (2%)	0	1	22
Diarrhea	18 (47.4%)	112 (26.5%)	2.49	0.0069	1	17 (45.9%)	131 (31%)	1.89	0.048	3	17 (47.2%)	143 (33.8%)	1.75	0.077	4	17 (29.3%)	112 (28%)	1.07	0.47	9	20 (34.5%)	128 (32%)	1.12	0.41	8	20 (40%)	140 (35%)	1.24	0.29	7
Dizziness	3 (7.9%)	29 (6.9%)	1.16	0.5	13	6 (16.2%)	39 (9.2%)	1.9	0.14	7	6 (16.7%)	46 (10.9%)	1.64	0.21	8	3 (5.2%)	29 (7.2%)	0.7	0.8	13	8 (13.8%)	38 (9.5%)	1.52	0.21	6	7 (14%)	45 (11.2%)	1.28	0.35	10
Dry_eyes	0 (0%)	0 (0%)	NA	0		0 (0%)	0 (0%)	NA	0		0 (0%)	1 (0.2%)	0	1	25	0 (0%)	0 (0%)	NA	0		0 (0%)	0 (0%)	NA	0		0 (0%)	1 (0.2%)	0	1	23
Dry_mouth	0 (0%)	0 (0%)	NA	0		0 (0%)	0 (0%)	NA	0		0 (0%)	0 (0%)	NA	0		0 (0%)	0 (0%)	NA	0		0 (0%)	0 (0%)	NA	0		0 (0%)	0 (0%)	NA	0
Fatigue	4 (10.5%)	18 (4.3%)	2.64	0.097	6	6 (16.2%)	31 (7.3%)	2.44	0.065	5	5 (13.9%)	49 (11.6%)	1.23	0.42	10	6 (10.3%)	16 (4%)	2.76	0.047	1	10 (17.2%)	27 (6.8%)	2.87	0.011	2	8 (16%)	44 (11%)	1.54	0.2	3
Frequent_urination	0 (0%)	0 (0%)	NA	0		0 (0%)	0 (0%)	NA	0		0 (0%)	0 (0%)	NA	0		0 (0%)	0 (0%)	NA	0		0 (0%)	0 (0%)	NA	0		0 (0%)	0 (0%)	NA	0
Headache	4 (10.5%)	14 (3.3%)	3.42	0.052	4	4 (10.8%)	17 (4%)	2.88	0.079	6	4 (11.1%)	20 (4.7%)	2.51	0.11	5	3 (5.2%)	15 (3.8%)	1.4	0.4	6	3 (5.2%)	18 (4.5%)	1.16	0.51	9	4 (8%)	20 (5%)	1.65	0.27	6
Heartburn	1 (2.6%)	9 (2.1%)	1.24	0.58	14	1 (2.7%)	12 (2.8%)	0.95	0.67	16	1 (2.8%)	14 (3.3%)	0.83	0.71	20	1 (1.7%)	9 (2.2%)	0.76	0.75	12	1 (1.7%)	12 (3%)	0.57	0.83	18	3 (6%)	12 (3%)	2.06	0.23	4
Hoarseness	0 (0%)	0 (0%)	NA	0		0 (0%)	0 (0%)	NA	0		0 (0%)	0 (0%)	NA	0		0 (0%)	0 (0%)	NA	0		0 (0%)	0 (0%)	NA	0		0 (0%)	0 (0%)	NA	0
Hot_flashes	0 (0%)	1 (0.2%)	0	1	20	0 (0%)	2 (0.5%)	0	1	23	0 (0%)	5 (1.2%)	0	1	26	0 (0%)	1 (0.2%)	0	1	20	0 (0%)	2 (0.5%)	0	1	23	0 (0%)	5 (1.3%)	0	1	24
Insomnia	0 (0%)	6 (1.4%)	0	1	21	0 (0%)	7 (1.7%)	0	1	24	1 (2.8%)	8 (1.9%)	1.48	0.52	14	1 (1.7%)	5 (1.3%)	1.38	0.56	10	1 (1.7%)	6 (1.5%)	1.15	0.62	12	2 (4%)	7 (1.8%)	2.33	0.26	5
Itching	0 (0%)	6 (1.4%)	0	1	22	0 (0%)	9 (2.1%)	0	1	25	1 (2.8%)	10 (2.4%)	1.18	0.6	18	2 (3.4%)	4 (1%)	3.52	0.17	3	3 (5.2%)	6 (1.5%)	3.57	0.093	3	3 (6%)	8 (2%)	3.12	0.11	2
Joint_pain	1 (2.6%)	3 (0.7%)	3.77	0.29	8	1 (2.7%)	5 (1.2%)	2.32	0.4	11	1 (2.8%)	8 (1.9%)	1.48	0.52	15	1 (1.7%)	3 (0.7%)	2.32	0.42	7	1 (1.7%)	5 (1.3%)	1.38	0.56	10	1 (2%)	7 (1.8%)	1.15	0.61	15
Mouth_throat_sores	0 (0%)	5 (1.2%)	0	1	23	1 (2.7%)	7 (1.7%)	1.65	0.49	15	1 (2.8%)	7 (1.7%)	1.7	0.48	12	1 (1.7%)	3 (0.7%)	2.32	0.42	8	1 (1.7%)	6 (1.5%)	1.15	0.62	13	1 (2%)	6 (1.5%)	1.34	0.56	14
Muscle_pain	1 (2.6%)	3 (0.7%)	3.77	0.29	9	1 (2.7%)	5 (1.2%)	2.32	0.4	12	1 (2.8%)	7 (1.7%)	1.7	0.48	13	0 (0%)	4 (1%)	0	1	21	1 (1.7%)	5 (1.3%)	1.38	0.56	11	1 (2%)	7 (1.8%)	1.15	0.61	16
Nail_loss	0 (0%)	0 (0%)	NA	0		0 (0%)	0 (0%)	NA	0		0 (0%)	0 (0%)	NA	0		0 (0%)	0 (0%)	NA	0		0 (0%)	0 (0%)	NA	0		0 (0%)	0 (0%)	NA	0
Nausea	1 (2.6%)	9 (2.1%)	1.24	0.58	15	1 (2.7%)	12 (2.8%)	0.95	0.67	17	1 (2.8%)	16 (3.8%)	0.73	0.76	21	0 (0%)	9 (2.2%)	0	1	22	0 (0%)	12 (3%)	0	1	24	0 (0%)	17 (4.3%)	0	1	25
Neuropathy	1 (2.6%)	6 (1.4%)	1.88	0.45	12	2 (5.4%)	10 (2.4%)	2.35	0.25	10	3 (8.3%)	17 (4%)	2.17	0.2	7	0 (0%)	7 (1.8%)	0	1	23	1 (1.7%)	11 (2.8%)	0.62	0.81	17	1 (2%)	20 (5%)	0.39	0.92	18
Pain_urination	0 (0%)	2 (0.5%)	0	1	24	1 (2.7%)	2 (0.5%)	5.8	0.22	9	1 (2.8%)	2 (0.5%)	5.97	0.22	9	1 (1.7%)	1 (0.2%)	6.95	0.24	4	1 (1.7%)	2 (0.5%)	3.48	0.33	7	1 (2%)	2 (0.5%)	4.04	0.3	8
Palpitations	2 (5.3%)	4 (0.9%)	5.78	0.08	5	2 (5.4%)	7 (1.7%)	3.38	0.16	8	3 (8.3%)	8 (1.9%)	4.69	0.047	3	1 (1.7%)	5 (1.3%)	1.38	0.56	11	1 (1.7%)	9 (2.2%)	0.76	0.75	16	2 (4%)	9 (2.2%)	1.81	0.35	11
Rash	1 (2.6%)	28 (6.6%)	0.38	0.92	16	3 (8.1%)	41 (9.7%)	0.82	0.71	18	4 (11.1%)	44 (10.4%)	1.08	0.53	16	7 (12.1%)	22 (5.5%)	2.35	0.059	2	12 (20.7%)	31 (7.8%)	3.09	0.0037	1	12 (24%)	34 (8.5%)	3.39	0.0021	1
Shortness_of_breath	6 (15.8%)	23 (5.4%)	3.25	0.024	3	7 (18.9%)	37 (8.7%)	2.43	0.051	4	6 (16.7%)	41 (9.7%)	1.86	0.15	6	5 (8.6%)	24 (6%)	1.48	0.3	5	9 (15.5%)	36 (9%)	1.85	0.097	4	6 (12%)	39 (9.8%)	1.26	0.38	12
Swelling	0 (0%)	1 (0.2%)	0	1	25	0 (0%)	1 (0.2%)	0	1	26	0 (0%)	1 (0.2%)	0	1	27	0 (0%)	1 (0.2%)	0	1	24	0 (0%)	1 (0.2%)	0	1	25	0 (0%)	1 (0.2%)	0	1	26
Taste_changes	1 (2.6%)	2 (0.5%)	5.65	0.23	7	2 (5.4%)	2 (0.5%)	11.88	0.034	2	2 (5.6%)	2 (0.5%)	12.22	0.032	2	0 (0%)	3 (0.7%)	0	1	25	0 (0%)	4 (1%)	0	1	26	0 (0%)	4 (1%)	0	1	27
Vomiting	3 (7.9%)	21 (5%)	1.64	0.32	10	3 (8.1%)	25 (5.9%)	1.4	0.4	13	3 (8.3%)	36 (8.5%)	0.98	0.61	19	1 (1.7%)	22 (5.5%)	0.3	0.96	14	2 (3.4%)	26 (6.5%)	0.51	0.89	19	4 (8%)	35 (8.8%)	0.91	0.65	17
Watery_eyes	0 (0%)	0 (0%)	NA	0		0 (0%)	0 (0%)	NA	0		0 (0%)	0 (0%)	NA	0		0 (0%)	0 (0%)	NA	0		0 (0%)	0 (0%)	NA	0		0 (0%)	0 (0%)	NA	0
