# Supplementary material for: Identification of Early Symptoms Associated with Subsequent Immune-related Adverse Events in the I-SPY clinical trial
Source: Research Square preprint supplement (doi:10.21203/rs.3.rs-8689063/v1), 2026-02-11
Supplement: Supplementary file 4 [file 5330d8ccc7d4a881b4bdc392.xlsx]

## Sheet: Sheet1
Timepoint	Outcome	Mean OSB (SD) for case	Mean OSB (SD) for control	Adjusted p-value	Symptoms used for OSB calculation
Week 4	Hypothyroidism	3.62 (11.11)	1.35 (7.18)	0.2	Itching, Fatigue
	Adrenal Insufficiency	13.66 (19.73)	5.2 (10.92)	<0.0001	Diarrhea, Headache, Joint pain, Shortness of breath
Week 6	Hypothyroidism	14.6 (22.66)	6.7 (16.97)	0.012	Rash, Shortness of breath, Fatigue, Painful urination
	Adrenal Insufficiency	31.11 (39.58)	10.6 (19.67)	<0.0001	Constipation, Diarrhea, Headache, Joint pain, Shortness of breath, Taste changes, Vomiting
Week 8	Hypothyroidism	20.64 (37.21)	9.27 (24.09)	0.024	Headache, Painful urination, Rash, Fatigue
	Adrenal Insufficiency	49.81 (57.79)	18.5 (30.68)	<0.0001	Constipation, Diarrhea, Dizziness, Headache, Joint pain, Shortness of breath, Taste changes, Vomiting
