# Supplementary material for: Identification of Early Symptoms Associated with Subsequent Immune-related Adverse Events in the I-SPY clinical trial
Source: Research Square preprint supplement (doi:10.21203/rs.3.rs-8689063/v1), 2026-02-11
Supplement: Supplementary file 5 [file 67bb106750d665ff851e3892.xlsx]

## Sheet: rocCurve_symptomAUCsum_hypothyr
threshold_symptomAUCsum	specificity	sensitivity	accuracy	Annotation
9.5	0.8175	0.431	0.7686	Youden's best
9.5	0.8175	0.431	0.7686
8.5	0.815	0.431	0.7664
7.5	0.8125	0.431	0.7642
6.5	0.81	0.431	0.762
5	0.8075	0.431	0.7598
3.5	0.805	0.431	0.7576
2.5	0.8025	0.431	0.7555
1.5	0.8	0.431	0.7533
0.5	0.7925	0.431	0.7467
11.5	0.8275	0.4138	0.7751
10.5	0.825	0.4138	0.7729
13	0.8325	0.3793	0.7751
14.5	0.845	0.3276	0.7795
19.5	0.865	0.3103	0.7948
18.5	0.8625	0.3103	0.7926
17.5	0.86	0.3103	0.7904
16.5	0.855	0.3103	0.786
15.5	0.85	0.3103	0.7817
21.5	0.8725	0.2759	0.7969
20.5	0.865	0.2759	0.7904
23.5	0.8775	0.2586	0.7991
22.5	0.875	0.2586	0.7969
25.5	0.8825	0.2414	0.8013
24.5	0.88	0.2414	0.7991
27.5	0.9025	0.1897	0.8122
26.5	0.8975	0.1897	0.8079
36.5	0.9275	0.1552	0.8297
35.5	0.925	0.1552	0.8275
34	0.92	0.1552	0.8231
32	0.9125	0.1552	0.8166
30.5	0.91	0.1552	0.8144
29.5	0.905	0.1552	0.81
28.5	0.9025	0.1552	0.8079
41.5	0.9425	0.1379	0.8406
40.5	0.94	0.1379	0.8384
39.5	0.9375	0.1379	0.8362
38.5	0.935	0.1379	0.8341
37.5	0.9325	0.1379	0.8319
42.5	0.9525	0.1207	0.8472
47.5	0.96	0.1034	0.8515
45.5	0.9575	0.1034	0.8493
44	0.955	0.1034	0.8472
64.5	0.975	0.069	0.8603
60.5	0.9725	0.069	0.8581
55	0.97	0.069	0.8559
51.5	0.9675	0.069	0.8537
50.5	0.965	0.069	0.8515
49.5	0.9625	0.069	0.8493
80	0.99	0.0517	0.8712
75	0.9875	0.0517	0.869
71	0.9825	0.0517	0.8646
68	0.975	0.0517	0.8581
83	0.99	0.0345	0.869
