# Supplementary material for: Identification of Early Symptoms Associated with Subsequent Immune-related Adverse Events in the I-SPY clinical trial
Source: Research Square preprint supplement (doi:10.21203/rs.3.rs-8689063/v1), 2026-02-11
Supplement: Supplementary file 6 [file 7c9d5ee1a9734031fc029654.xlsx]

## Sheet: Sheet1
Symptom	Corresponding CTCAEv4 terms	Grades included
Abdominal Pain	"Abdominal pain" | "Abdominal_pain"	>1
Acne	"Rash acneiform" | "Rash_acneiform"	>1
Blurred Vision	"Blurred vision" | "Blurred_vision"	>1
Constipation	"Constipation"	>1
Cough	"Cough" | "Productive cough" | "Productive_cough"	>1
Decreased Appetite	"Anorexia"	>1
Diarrhea	"Diarrhea_(Diarrhoea)" | "Diarrhea"	>1
Dizziness	"Dizziness"	all
Dry Eyes	"Dry eye" | "Dry_eye"	>1
Dry Mouth	"Dry mouth" | "Dry_mouth"	>1
Frequent Urination	"Urinary frequency" | "Urinary_frequency"	>1
Headache	"Headache" | "Sinus_headache"	>1
Heartburn	"Gastroesophageal_reflux_disease_(Gastrooesophageal_reflux_disease)"| "Epigastric_discomfort"| "Dyspepsia" | "Gastroesophageal reflux disease"	>1
Hoarseness	"Hoarseness"	>1
Hot Flashes	"Hot_flashes" | "Hot flashes"	>1
Insomnia	"Insomnia"	>1
Itching	"Pruritus" | "Rash_pruritic"	>1
Joint Pain	"Arthralgia"	>1
Lose Fingernails or Toenails	"Nail loss" | "Nail_loss"	all
Mouth/Throat Sores	"Mucositis oral"| "Mucositis_oral"| "Laryngeal mucositis"	>1
Muscle Pain	"Myalgia"	>1
Nausea	"Nausea"	>1
Numbness/Tingling	"Peripheral sensory neuropathy"| "Peripheral motor neuropathy"| "Peripheral_sensory_neuropathy"| "Neuropathy_peripheral"| "Paresthesia" | "Peripheral_motor_neuropathy"	>1
Painful Urination	"Urinary tract pain" | "Urinary_tract_pain" | "Dysuria"	all
Palpitations	"Palpitations"	all
Rash	"Rash" | "Papulopustular rash"| "Rash maculo-papular"| "Rash_macular"| "Rash_erythematous"| "Rash_maculo-papular" | "Papulopustular_rash"| "Rash_papular"| "Rash_pruritic"	>1
Shortness of Breath	"Dyspnea" | "Dyspnea_(Dyspnoea)"	>1
Swelling	"Edema limbs"| "Edema face"| "Edema trunk"| "Edema_limbs"| "Localized edema"| "Lymphedema"| "Periorbital edema"| "Papilledema"| "Neck edema"| "Edema_(Oedema)") | "Localized_edema_(Localised_oedema)"| "Generalized edema"| "Neck_edema"| "Edema_face_(Face_oedema)"| "Periorbital_edema_(Periorbital_oedema)"	>1
Taste Changes	"Dysgeusia"	>1
Vomiting	"Vomiting"	>1
Watery Eyes	"Watering_eyes" | "Watering eyes"	>1
Fatigue	"Fatigue"	>1
