# Supplementary material for: Identification of Early Symptoms Associated with Subsequent Immune-related Adverse Events in the I-SPY clinical trial
Source: Research Square preprint supplement (doi:10.21203/rs.3.rs-8689063/v1), 2026-02-11
Supplement: Supplementary file 7 [file 89d16d9519e1fb34f83edb28.xlsx]

## Sheet: Sheet1
Arm	N
Paclitaxel + Cemiplimab (PD-1 inhibitor)	65
Paclitaxel + Cemiplimab + REGN3767 (LAG3 inhibitor)	84
Paclitaxel + Durvalumab (PD-L1 inhibitor) + Olaparib (PARP inhibitor)	73
Paclitaxel + Pembrolizumab 4-Cycle (PD-1 inhibitor)	69
Paclitaxel + Pembrolizumab 8-Cycle	112
Paclitaxel + SD-101 (TLR9 stimulator) + Pembrolizumab	79
