# Supplementary material for: Identification of Early Symptoms Associated with Subsequent Immune-related Adverse Events in the I-SPY clinical trial
Source: Research Square preprint supplement (doi:10.21203/rs.3.rs-8689063/v1), 2026-02-11
Supplement: Supplementary file 8 [file eb0348fe4afeee761a1ed23c.xlsx]

## Sheet: Sheet1
Timepoint	Outcome	Mean No. of Symptoms for Case (SD)	Mean No. of Symptoms for Control (SD)	Odds Ratio	p Value	Adjusted p-value
Week 4	Adrenal Insufficiency	1.32 (1.32)	0.75 (1.03)	1.4561	0.0027	0.008
	Hypothyroidism	0.86 (0.98)	0.78 (1.07)	1.072	0.58	1
Week 6	Adrenal Insufficiency	1.65 (1.48)	1.01 (1.3)	1.3271	0.0066	0.027
	Hypothyroidism	1.34 (1.29)	1.03 (1.34)	1.1685	0.096	0.39
Week 8	Adrenal Insufficiency	1.83 (1.56)	1.23 (1.49)	1.2451	0.024	0.071
	Hypothyroidism	1.58 (1.49)	1.25 (1.54)	1.1319	0.16	0.47
